# Supplementary material for: Nickel Uptake by Cypress Pine (Callitris glaucophylla) in the Miandetta Area, Australia: Implications for Use in Biogeochemical Exploration
Source: MDPI journal article supplement (doi:10.3390/min11080808), 2021-07-26
Supplement: s1 [file s1]

## Article

# Nickel Uptake by Cypress Pine (*Callitris glaucophylla*) in the Miandetta Area, Australia: Implications for Use in Biogeochemical Exploration

Kenneth McQueen <sup>1,\*</sup>, Augustine Alorbi <sup>2</sup>, Joseph Schifano <sup>3,4</sup> and David Cohen <sup>3,4</sup>

<sup>1</sup> Faculty of Science and Technology, University of Canberra, Canberra, ACT 2601, Australia

<sup>2</sup> MMG Ltd., Sydney, NSW 2001, Australia; aalorbi@gmail.com

<sup>3</sup> School of Biological, Earth and Environmental Sciences, University of New South Wales, Sydney, NSW 2052, Australia; j.schifano@unsw.edu.au (J.S.); d.cohen@unsw.edu.au (D.C.)

<sup>4</sup> Mineral Exploration Cooperative Research, Kensington, WA 6151, Australia

\* Correspondence: ken.mcqueen@canberra.edu.au

**Table S1.** Details of analytical methods.

|                |                                                                                                  |
|----------------|--------------------------------------------------------------------------------------------------|
| <b>Method:</b> | <b>BQ-INAA-1</b>                                                                                 |
| Laboratory:    | Becquerel Laboratories, Canada                                                                   |
| Sample form:   | Milled vegetation (<2mm)                                                                         |
| Sample weight: | 15 g in plastic containers                                                                       |
| Digestion:     | Nil                                                                                              |
| Analysis:      | Instrumental neutron activation analysis (INAA)                                                  |
| Analytes:      | Ag, As, Au, Ba, Br, Cd, Ce, Co, Cr, Fe, Ir, La, Mo, Na, Ni, Rb, Sb, Sc, Se, Sm, Ta, Th, U, W, Zn |
| <b>Method:</b> | <b>BVeg/OES</b>                                                                                  |
| Laboratory:    | Genalysis Laboratories                                                                           |
| Sample form:   | Milled vegetation (<2mm)                                                                         |
| Sample weight: | 15 g                                                                                             |
| Digestion:     | aqua regia                                                                                       |
| Analysis:      | ICP-OES                                                                                          |
| Analytes:      | Al, B, Ca, Cu, Fe, K, Mg, Mn, Na, Ni, P, S, Ti, V, Zn                                            |
| <b>Method:</b> | <b>ME-ICP44</b>                                                                                  |
| Laboratory:    | ALS-Chemex                                                                                       |
| Sample form:   | 1 kg bulk sample dried at 60° C, 250 g pulverised to 85% < 75µm in low Cr steel ring mill.       |
| Sample weight: | 0.5 g                                                                                            |
| Digestion:     | Aqua regia digestion                                                                             |
| Analysis:      | ICP-AES                                                                                          |
| Analytes:      | Au, Sc, Ag, As, Ba, Bi, Ca, Cd, Co, Cu, Fe, Mg, Mn, Mo, Ni, P, Pb, S, Sb, Zn                     |
| <b>Method:</b> | <b>MSA-06</b>                                                                                    |
| Laboratory:    | LabWest                                                                                          |
| Sample form:   | Milled vegetation (<2mm)                                                                         |

|                |                                                                                                                                                                                                                                                                   |
|----------------|-------------------------------------------------------------------------------------------------------------------------------------------------------------------------------------------------------------------------------------------------------------------|
| Sample weight: | 1 g                                                                                                                                                                                                                                                               |
| Digestion:     | Microwave assisted aqua regia at 2455 Hz in sealed Teflon® containers                                                                                                                                                                                             |
| Analysis:      | ICP-MS                                                                                                                                                                                                                                                            |
| Analytes:      | Ag, Al, As, Au, B, Ba, Be, Bi, Br, Ca, Cd, Ce, Co, Cr, Cs, Cu, Dy, Er, Eu, Fe, Ga, Gd, Ge, Hf, Hg, Ho, I, In, K, La, Li, Lu, Mg, Mn, Mo, Na, Nb, Nd, Ni, P, Pb, Pd, Pr, Pt, Rb, Re, S, Sb, Sc, Se, Sm, Sn, Sr, Ta, Tb, Te, Th, Ti, Tl, Tm, U, V, W, Y, Yb, Zn, Zr |
| <b>Method:</b> | <b>pXRF</b>                                                                                                                                                                                                                                                       |
| Laboratory:    | UNSW                                                                                                                                                                                                                                                              |
| Sample form:   | Milled vegetation (<2mm)                                                                                                                                                                                                                                          |
| Sample weight: | 3 g compressed into 50µm-thick polythene bags (minimum sample depth 10 mm)                                                                                                                                                                                        |
| Digestion:     | Nil                                                                                                                                                                                                                                                               |
| Analysis:      | pXRF - Olympus Vanta<br>30s count on each of three beams in 'Geochem' mode                                                                                                                                                                                        |
| Analytes:      | Ag, Al, As, Au, B, Ba, Be, Bi, Br, Ca, Cd, Ce, Cr, Cs, Cu, Dy, Er, Eu, Fe, Ga, Gd, Ge, Hf, Hg, Ho, In, K, La, Li, Lu, Mg, Mn, Mo, Na, Nb, Nd, Ni, P, Pb, Pd, Pr, Pt, Rb, Re, S, Sb, Sc, Se, Sm, Sn, Sr, Ta, Tb, Te, Th, Ti, Tl, Tm, U, V, W, Y, Yb, Zn, Zr        |

### Sequential selective extractions:

#### *Exchangeable metals.*

Forty mL of 0.11 mol L<sup>-1</sup> acetic acid was added to each of the 1.00 g sixteen dry soil samples in a 50 mL polypropylene centrifuge tubes. The mixtures were tumbled for 20 hours at 22±5°C (overnight). The extract was separated from the solid phase by centrifugation at 3800 rpm 20 min. The supernatant liquid was decanted and filtered through a 45 µm into a 15 ml tube. The residue was washed by adding 20 ml of double-distilled water, shaking for 15 min and then centrifuging. The second supernatant liquid was discarded without any loss of residue.

#### *Metals bound to iron and manganese oxides.*

Metals bound to iron and manganese oxide were extracted by adding 40 mL of 0.1 mol L<sup>-1</sup> hydroxyl ammonium chloride (adjusted to pH 2.34 with 25 ml of 2 mol L<sup>-1</sup> nitric acid) onto the residue from the first step. After tumbling the mixture for 20 hours at 22±3°C, it was centrifuged for 15 min, and then decanted and filtered into a tube. Using 20 ml of distilled water, the residue was washed, centrifuged, and the supernatant discarded.

#### *Metals bound to organic matter and sulphides.*

Ten mL of 8.8 mol L<sup>-1</sup> hydrogen peroxide was carefully added in small aliquots to the residue in the centrifuge tube. The tube ingredients were digested at room temperature for 1 hour with occasional manual shaking. The procedure was continued for 1 hour at 85 ±3°C in a thermostat controlled water bath. A second aliquot of 10 ml of hydrogen peroxide was added to the residue and the digestion procedure was repeated. The solution was heated to near dryness, and 50 ml of 1.0 mol L<sup>-1</sup> ammonium acetate solution (adjusted to pH 2.31 with 25ml of 2M nitric acid) was added to the moist residue. The sample solution was tumbled for 20 hours overnight and centrifuged, and the extract was separated and filtered as described above.

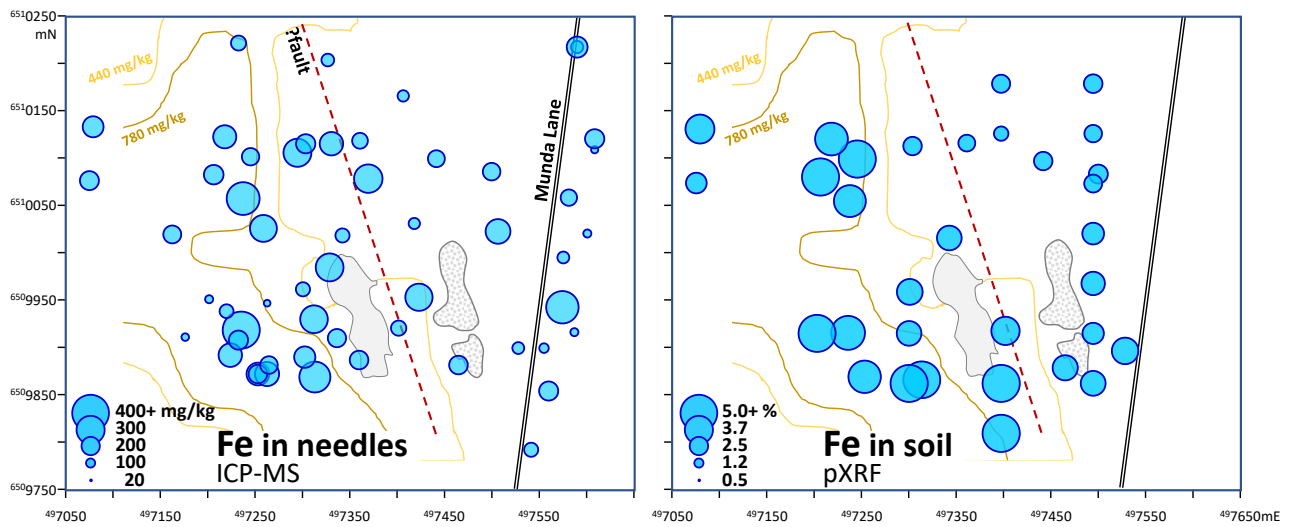

**Figure S1.** Spatial variation in the Fe content of *C. glaucophylla* needles (by pXRF and top 20 cm of soil (by pXRF) at Site 1, with 720 and 430 mg/kg Ni soil grid contours.

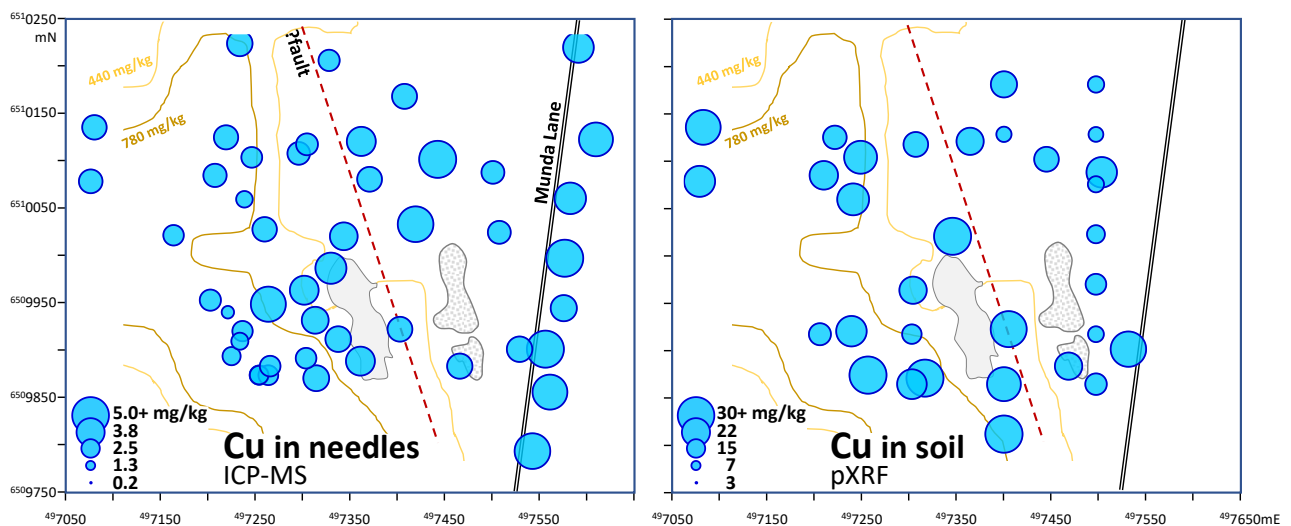

**Figure S2.** Spatial variation in the Cu content of *C. glaucophylla* needles (by pXRF and top 20 cm of soil (by pXRF) at Site 1, with 720 and 430 mg/kg Ni soil grid contours.

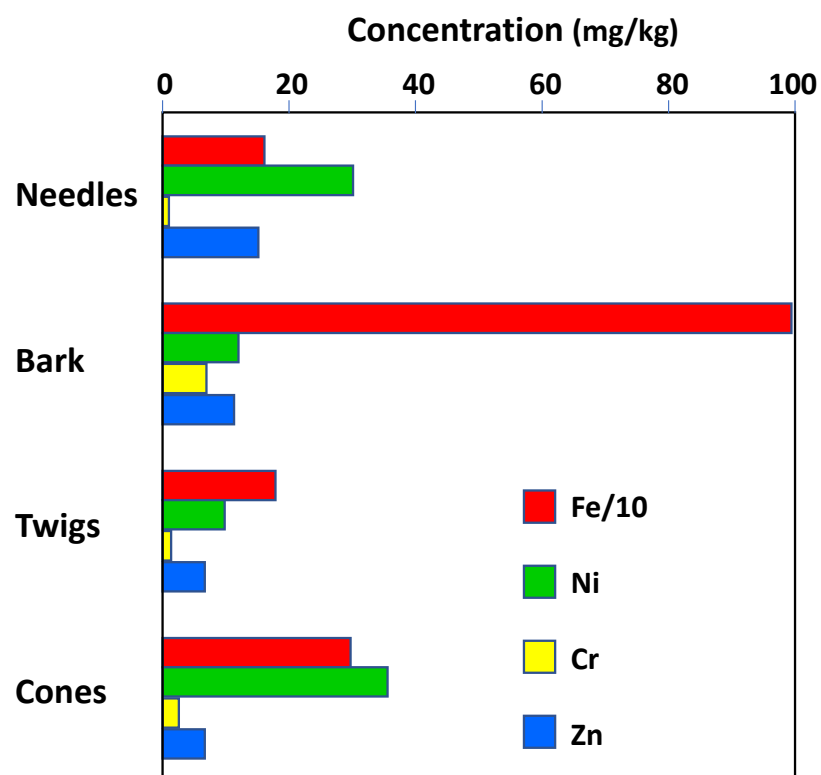

**Figure S3.** Comparison between the Fe, Ni, Cr and Zn content of the needles, cones, twigs and bark of *C. glaucophylla* tree M11.

**Table S2.** Summary statistics for element contents of *C. glaucophylla* from Sites 1 and 2 in the Miandetta area by ar ICP-MS/OES and pXRF.

| Element | Method | Units | DL    | Count | Min   | Q1    | Median | Q2    | 95 <sup>th</sup> %ile | Max   |
|---------|--------|-------|-------|-------|-------|-------|--------|-------|-----------------------|-------|
| Ag      | ar ICP | Ppb   | 0.1   | 59    | 0.8   | 1.9   | 2.4    | 3.0   | 4.7                   | 6.4   |
| Al      | ar ICP | %     | 0.002 | 79    | 0.006 | 0.020 | 0.029  | 0.039 | 0.057                 | 0.086 |
| Al      | pXRF   | %     | 0.01  | 59    | 0.12  | 0.14  | 0.15   | 0.16  | 0.17                  | 0.18  |
| As      | ar ICP | Ppb   | 10    | 81    | 10    | 40    | 53     | 96    | 130                   | 160   |
| Au      | ar ICP | ppb   | 0.05  | 59    | 0.05  | 0.08  | 0.20   | 0.41  | 0.74                  | 5.47  |
| B       | ar ICP | ppb   | 0.5   | 79    | 9.5   | 21.5  | 27.0   | 32.4  | 43.4                  | 63.0  |
| Ba      | ar ICP | ppm   | 0.05  | 59    | 2.54  | 7.63  | 13.23  | 26.44 | 45.03                 | 47.17 |
| Ba      | pXRF   | ppm   | 5     | 59    | 5     | 5     | 5      | 9     | 22                    | 25    |
| Be      | ar ICP | ppb   | 0.5   | 59    | 2.6   | 11.3  | 16.1   | 24.1  | 40.3                  | 52.6  |
| Bi      | ar ICP | ppb   | 0.5   | 59    | 0.3   | 1.1   | 1.7    | 2.3   | 5.6                   | 9.6   |
| Ca      | ar ICP | %     | 0.005 | 79    | 0.397 | 0.744 | 0.860  | 1.031 | 1.380                 | 1.599 |
| Ca      | pXRF   | %     | 0.03  | 59    | 0.68  | 0.96  | 1.12   | 1.54  | 1.93                  | 2.08  |
| Cd      | ar ICP | ppb   | 0.2   | 59    | 0.1   | 5.3   | 10.3   | 22.3  | 32.0                  | 57.0  |
| Ce      | ar ICP | ppb   | 5     | 59    | 14    | 37    | 46     | 65    | 95                    | 112   |
| Co      | ar ICP | ppb   | 0.01  | 59    | 0.10  | 0.20  | 0.31   | 0.61  | 1.64                  | 2.46  |
| Cr      | ar ICP | ppb   | 0.1   | 59    | 0.3   | 0.6   | 0.8    | 1.0   | 1.4                   | 1.8   |
| Cs      | ar ICP | ppb   | 0.5   | 59    | 10.1  | 20.3  | 25.8   | 33.1  | 49.6                  | 62.8  |
| Cu      | ar ICP | ppm   | 0.003 | 59    | 0.179 | 0.294 | 0.344  | 0.406 | 0.498                 | 0.548 |
| Dy      | ar ICP | ppb   | 0.5   | 59    | 5.3   | 19.4  | 27.5   | 36.9  | 51.5                  | 56.2  |
| Er      | ar ICP | ppb   | 0.2   | 59    | 0.1   | 5.4   | 8.0    | 12.1  | 19.6                  | 21.6  |
| Eu      | ar ICP | ppb   | 0.2   | 59    | 0.1   | 6.0   | 8.5    | 11.8  | 18.1                  | 22.6  |
| Fe      | ar ICP | %     | 0.001 | 81    | 0.009 | 0.017 | 0.022  | 0.031 | 0.043                 | 0.060 |
| Fe      | pXRF   | %     | 0.005 | 59    | 0.008 | 0.019 | 0.032  | 0.059 | 0.100                 | 0.127 |
| Ga      | ar ICP | ppb   | 1     | 59    | 30    | 73    | 93     | 128   | 189                   | 252   |
| Gd      | ar ICP | ppb   | 0.5   | 59    | 7.5   | 23.5  | 32.3   | 40.9  | 76.5                  | 84.9  |
| Ge      | ar ICP | ppb   | 3     | 59    | 3     | 7     | 9      | 11    | 15                    | 17    |
| Hf      | ar ICP | ppb   | 0.5   | 59    | 3.3   | 6.9   | 9.2    | 11.7  | 18.1                  | 21.9  |
| Hg      | ar ICP | ppb   | 0.5   | 59    | 1.7   | 9.6   | 14.5   | 18.7  | 23.8                  | 47.2  |
| Ho      | ar ICP | ppb   | 0.1   | 59    | 0.8   | 3.05  | 3.6    | 5.5   | 8.15                  | 11.8  |
| I       | ar ICP | ppm   | 0.01  | 59    | 0.18  | 0.35  | 0.47   | 0.65  | 1.37                  | 2.02  |
| In      | ar ICP | ppb   | 0.1   | 59    | 0.2   | 0.3   | 0.3    | 0.4   | 0.7                   | 1.0   |
| K       | ar ICP | %     | 0.005 | 79    | 0.419 | 0.563 | 0.642  | 0.710 | 0.903                 | 1.130 |
| K       | pXRF   | %     | 0.01  | 59    | 0.23  | 0.35  | 0.40   | 0.48  | 0.68                  | 1.00  |
| La      | ar ICP | ppm   | 0.01  | 59    | 0.08  | 0.19  | 0.24   | 0.33  | 0.50                  | 0.56  |
| Li      | ar ICP | ppm   | 0.005 | 59    | 0.044 | 0.223 | 0.336  | 0.459 | 0.839                 | 1.152 |
| Lu      | ar ICP | ppb   | 0.1   | 59    | 0.1   | 0.6   | 1.5    | 2.8   | 4.4                   | 6.0   |
| Mg      | ar ICP | %     | 0.005 | 79    | 0.139 | 0.215 | 0.245  | 0.305 | 0.389                 | 0.521 |
| Mn      | ar ICP | ppm   | 2     | 79    | 58    | 107   | 174    | 250   | 472                   | 1403  |
| Mn      | pXRF   | ppm   | 5     | 59    | 69    | 128   | 193    | 314   | 626                   | 979   |
| Mo      | ar ICP | ppb   | 1     | 59    | 1     | 24    | 46     | 99    | 342                   | 384   |
| Mo      | pXRF   | ppm   | 2     | 59    | 2     | 4     | 5      | 5     | 6                     | 7     |
| Na      | ar ICP | ppm   | 5     | 79    | 7     | 36    | 54     | 108   | 227                   | 412   |

Table S1. ctd.

| Element | Method | Units | DL    | Count | Min   | Q1    | Median | Q2    | 95 <sup>th</sup> % <sup>ile</sup> | Max   |
|---------|--------|-------|-------|-------|-------|-------|--------|-------|-----------------------------------|-------|
| Nb      | ar ICP | ppb   | 1     | 59    | 8     | 17    | 21     | 26    | 33                                | 44    |
| Nd      | ar ICP | ppm   | 0.005 | 59    | 0.067 | 0.166 | 0.209  | 0.292 | 0.476                             | 0.491 |
| Ni      | ar ICP | ppm   | 0.1   | 81    | 2.0   | 4.2   | 12.0   | 33.7  | 155.6                             | 178.5 |
| Ni      | pXRF   | ppm   | 5     | 59    | 5     | 5     | 5      | 29    | 177                               | 250   |
| P       | ar ICP | %     | 0.002 | 79    | 0.061 | 0.074 | 0.090  | 0.104 | 0.127                             | 0.153 |
| Pb      | ar ICP | ppb   | 1     | 59    | 76    | 118   | 140    | 174   | 248                               | 430   |
| Pd      | ar ICP | ppb   | 0.1   | 59    | 0.1   | 0.6   | 0.7    | 1.3   | 2.5                               | 3.2   |
| Pr      | ar ICP | ppb   | 0.5   | 59    | 15.8  | 42.9  | 54.4   | 76.5  | 117.5                             | 127.1 |
| Pt      | ar ICP | ppb   | 0.1   | 59    | 0.1   | 0.1   | 0.1    | 0.2   | 0.3                               | 0.6   |
| Rb      | ar ICP | ppm   | 0.01  | 59    | 0.95  | 1.77  | 2.06   | 2.46  | 3.04                              | 3.58  |
| Re      | ar ICP | ppb   | 0.01  | 59    | 0.01  | 0.05  | 0.09   | 0.17  | 0.27                              | 0.56  |
| S       | ar ICP | %     | 0.02  | 79    | 0.09  | 0.12  | 0.13   | 0.14  | 0.15                              | 0.16  |
| S       | pXRF   | %     | 0.01  | 59    | 0.01  | 0.03  | 0.04   | 0.04  | 0.06                              | 0.08  |
| Sb      | ar ICP | ppb   | 0.5   | 59    | 1.1   | 2.9   | 3.8    | 5.4   | 8.2                               | 9.3   |
| Sc      | ar ICP | ppb   | 1     | 59    | 18    | 42    | 55     | 67    | 88                                | 119   |
| Se      | ar ICP | ppb   | 10    | 59    | 46    | 83    | 111    | 180   | 295                               | 351   |
| Si      | pXRF   | %     | 0.10  | 59    | 0.10  | 0.13  | 0.14   | 0.15  | 0.16                              | 0.17  |
| Sm      | ar ICP | ppb   | 0.5   | 81    | 12.6  | 29.4  | 38.9   | 57.5  | 90.0                              | 120.0 |
| Sn      | ar ICP | ppb   | 1     | 59    | 4     | 12    | 16     | 24    | 36                                | 41    |
| Sr      | ar ICP | ppm   | 3     | 59    | 43    | 78    | 101    | 119   | 164                               | 363   |
| Sr      | pXRF   | ppm   | 3     | 59    | 16    | 49    | 62     | 75    | 128                               | 221   |
| Ta      | ar ICP | ppm   | 0.1   | 59    | 0.05  | 0.9   | 1.4    | 1.8   | 2.31                              | 2.8   |
| Tb      | ar ICP | ppb   | 0.3   | 59    | 0.3   | 2.9   | 4.3    | 5.7   | 7.7                               | 11.8  |
| Te      | ar ICP | ppb   | 0.3   | 59    | 0.3   | 0.9   | 1.9    | 2.5   | 4.3                               | 6.0   |
| Th      | ar ICP | ppm   | 0.5   | 59    | 17.6  | 45.8  | 53.4   | 75.0  | 112.5                             | 122.9 |
| Th      | pXRF   | ppm   | 5     | 59    | 15    | 33    | 39     | 44    | 55                                | 68    |
| Ti      | ar ICP | ppm   | 0.1   | 59    | 4.7   | 7.8   | 9.1    | 10.9  | 15.8                              | 24.0  |
| Ti      | pXRF   | ppm   | 25    | 59    | 25    | 106   | 171    | 216   | 333                               | 432   |
| Tl      | ar ICP | ppb   | 0.5   | 59    | 0.3   | 0.8   | 1.5    | 2.6   | 4.6                               | 6.2   |
| Tm      | ar ICP | ppb   | 0.1   | 59    | 0.21  | 0.945 | 1.32   | 1.86  | 2.875                             | 4.81  |
| U       | ar ICP | ppm   | 0.5   | 59    | 2.0   | 4.3   | 5.5    | 7.9   | 10.8                              | 16.2  |
| U       | pXRF   | ppm   | 3     | 59    | 6     | 10    | 11     | 13    | 17                                | 19    |
| V       | ar ICP | ppm   | 0.05  | 59    | 0.12  | 0.36  | 0.48   | 0.62  | 0.91                              | 1.42  |
| W       | ar ICP | ppm   | 0.1   | 59    | 0.1   | 0.2   | 1.1    | 2.0   | 3.3                               | 14.2  |
| Y       | ar ICP | ppb   | 0.5   | 59    | 37.0  | 100.8 | 120.8  | 164.6 | 228.8                             | 276.9 |
| Yb      | ar ICP | ppb   | 0.5   | 59    | 1.7   | 5.8   | 8.7    | 13.0  | 17.4                              | 26.4  |
| Zn      | ar ICP | ppm   | 0.1   | 81    | 9.0   | 12.0  | 14.9   | 17.9  | 24.0                              | 25.0  |
| Zn      | pXRF   | ppm   | 4     | 59    | 11    | 16    | 18     | 23    | 30                                | 38    |
| Zr      | ar ICP | ppm   | 0.01  | 59    | 0.07  | 0.17  | 0.21   | 0.28  | 0.49                              | 0.62  |

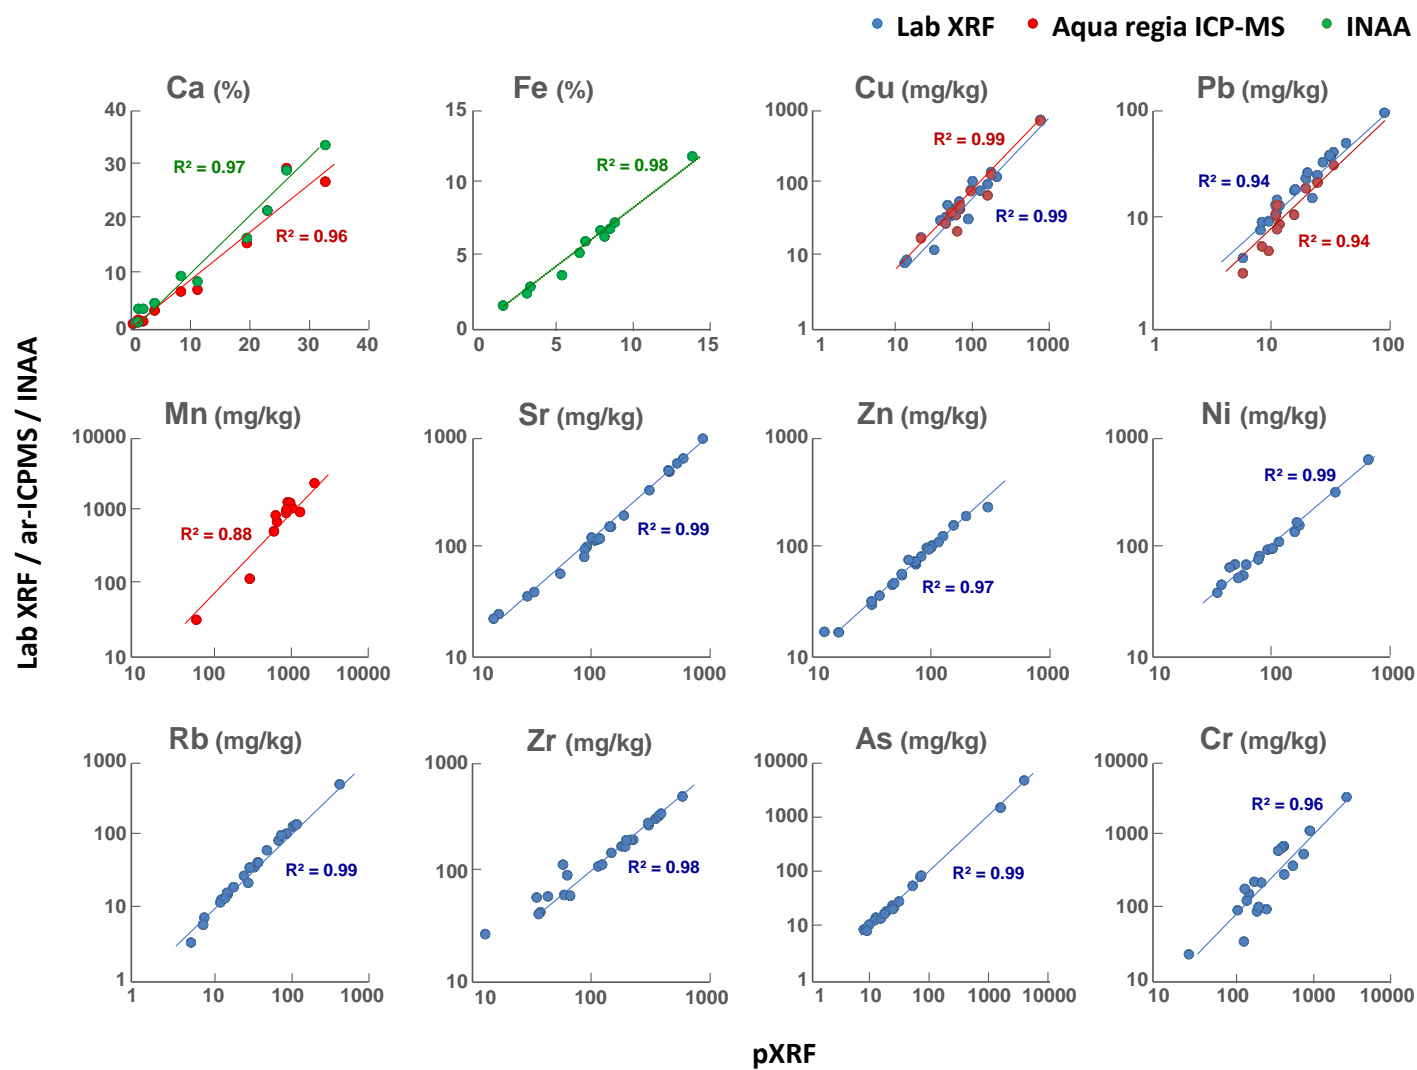

**Figure S4.** Comparison between pXRF and other analytical methods for certified and in-house soil reference materials.  $R^2$  values are significant at  $p=0.05$ .

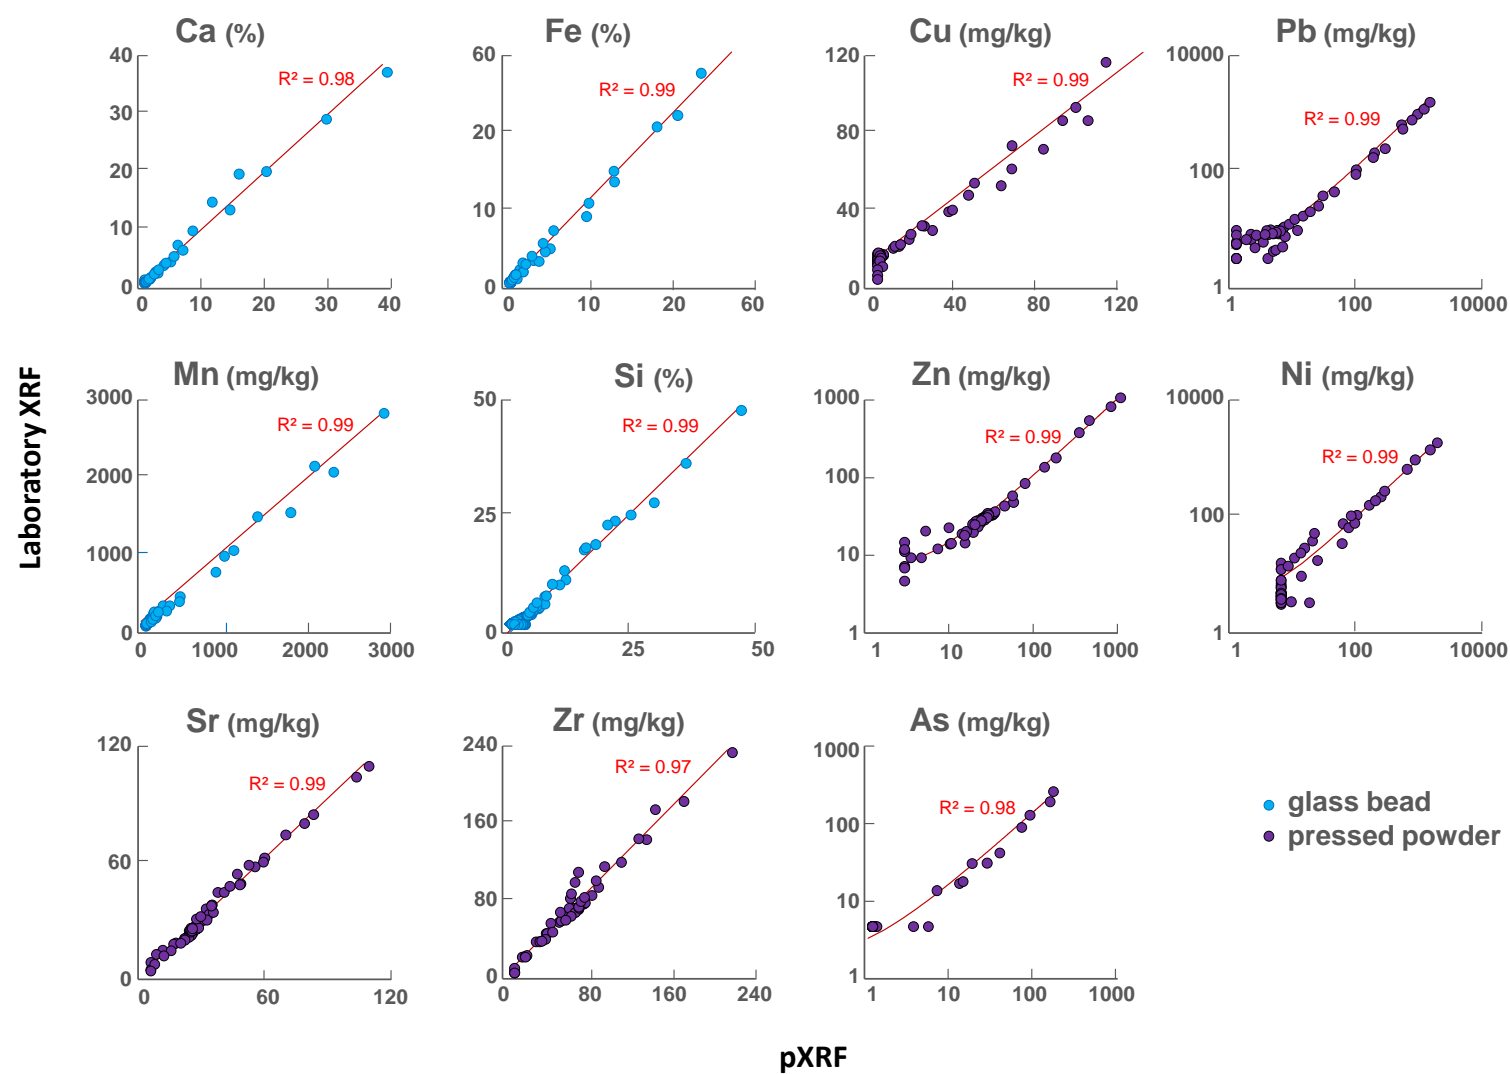

**Figure S5.** Comparison between pXRF and laboratory XRF for series of coal-based synthetic geochemical references materials (see [21]).  $R^2$  values are significant at  $p=0.05$ .



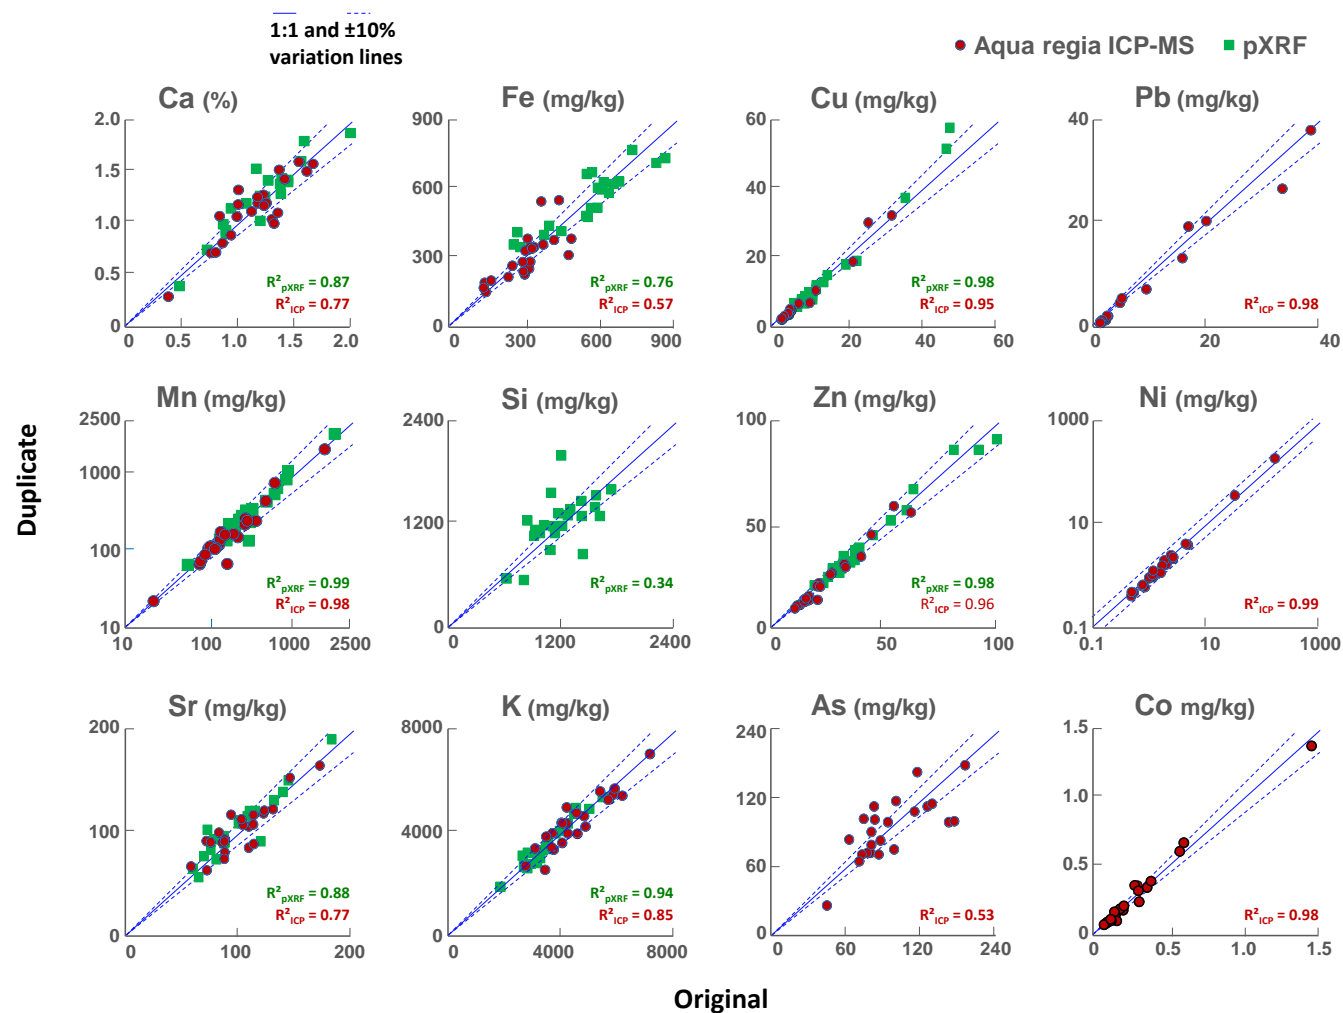

**Figure S6.** Plots of analytical duplicates of needle samples by pXRF and ICP-MS for selected elements, with 1:1 and  $\pm 10\%$  variation lines and  $R^2$  values for correlation between duplicates. For Co, Cu, K, Mn, Ni and Zn over 90% of duplicates are within the  $\pm 10\%$  variation limits for both analytical methods. There is substantially more scatter for Ca, Fe and Sr by both methods and Si and As by ICP-MS, though the  $R^2$  values all exceed 0.5 (apart from Si) which is significant at  $p=0.05$ .
